# Supplementary material for: Vital Signs of Severe COVID-19 Patients During Inter-Hospital Helicopter Transfer
Source: Research Square preprint supplement (doi:10.21203/rs.3.rs-1203192/v3), 2022-01-24
Supplement: Supplementary file 1 [file 9304de745d4a567c3ada2aab.docx]

Table 1. **Patient characteristics**

Gender M/F 69 / 29

Age (yr) 62.3 ± 11.5

Weight (kg) 91.6 ± 16.7

Height (cm) 175 ± 9.4

Body Mass Index (kg*m-2) 30.3 ± 6.0

Ventilation mode **PCV** 80 (82%)

PEEP (cmH2O) 12.4 ± 2.2

PC (cmH2O) 14.3 ± 2.7

**VCV** 10 (10 %)

PEEP (cmH2O) 12.3 ± 2.6

TV (ml) 407 ± 42

**PSV** 8 (8%)

PEEP (cmH2O) 10.7 ± 2.3

PS (cmH2O) 8.7 ± 3.6

Trachea cannula 4 (4)

Inspired oxygen (%) 52 ± 12

Flight time (min) 56 ± 16

Range (min) 35-149

Total flight time (min) 5497

Flight distance (km) 156 ± 46

Range (km) 71-272

Total distance (km) 15314

Sedation Midazolam 26 (27%)

Propofol 24 (25%)

Midazolam + Propofol 48 (49%)

Opoids ` 91 (93%)

Rocuronium 45 (46%)

Bolus number

Sedation 70

Opiods 20

Rocuronium 45

Vasoactive 14

Nor epinephrine 82 (84%)

Mean dose ± SD (µg/kg/minute) 0.07 ± 0.05
